# Supplementary material for: Preparation and application of cobalt oxide nanostructures as electrode materials for electrochemical supercapacitors
Source: Royal Society of Chemistry journal article supplement (doi:10.1039/c5ra09060a), 2015-01-01
Supplement: c5ra09060a1.pdf [file c5ra09060a1.pdf]

## Supporting information

### Preparation and Application of Cobalt Oxide Nanochains as Electrode Materials for Electrochemical Supercapacitors

Faranak Manteghi<sup>1,\*</sup>, Sayed Habib Kazemi<sup>2,\*</sup>, Masoud Peyvandipoor<sup>1</sup>, Ahmad Asghari<sup>2</sup>

<sup>1</sup>*Department of Chemistry, Iran University of Science and Technology, Tehran, Iran*

<sup>1</sup>*Department of Chemistry, Institute for Advanced Studies in Basic Sciences (IASBS), Zanjan, Iran*

\*Corresponding Authors: Faranak Manteghi, correspondence for synthesis and characterization section ([f\\_manteghi@iust.ac.ir](mailto:f_manteghi@iust.ac.ir)); Sayed Habib Kazemi, Correspondence for electrochemical tests and results ([habibkazemi@iasbs.ac.ir](mailto:habibkazemi@iasbs.ac.ir))

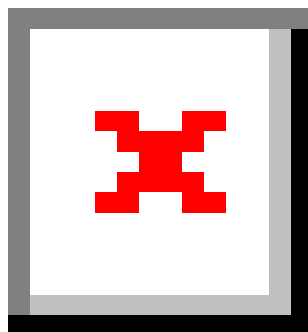

**Figure S-1.** The N<sub>2</sub> adsorption-desorption isotherm of sample

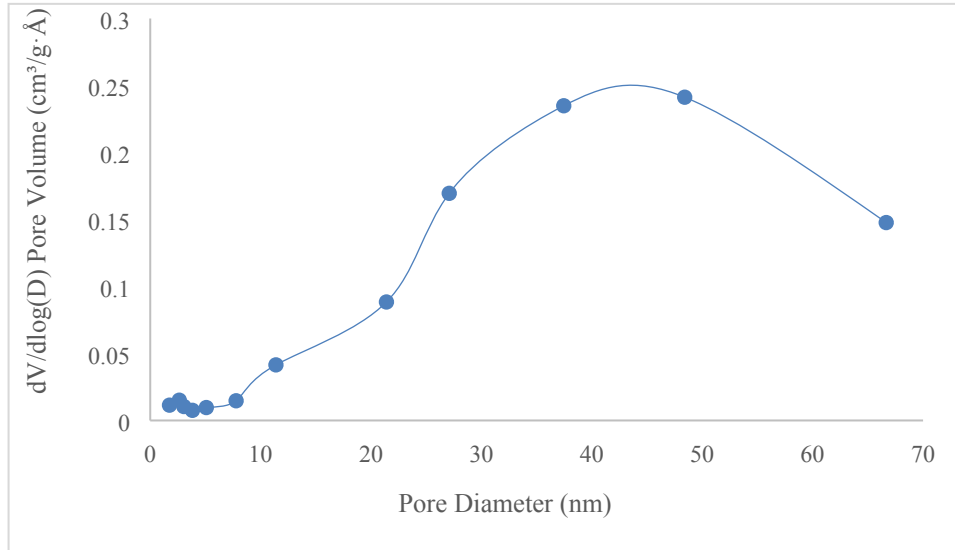

**Figure S-2.** (BJH) pore size distribution

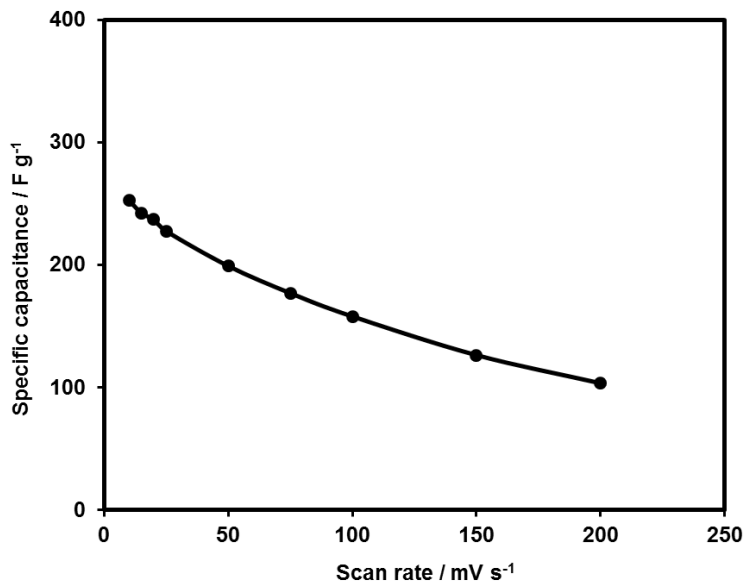

**Figure S-3.** Plot of specific capacitance against the scan rate of potential for cobalt oxide-carbon black composite fabricated under inert atmosphere

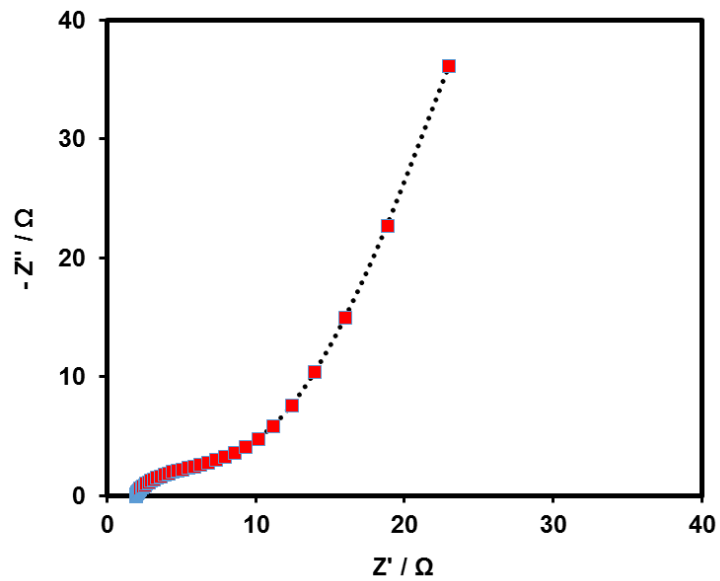

**Figure S-4.** Nyquist diagram recorded for cobalt oxide-carbon black composite fabricated under inert atmosphere at open circuit potential
